# Supplementary material
Source: Springer Nature journal article supplement (https://www.springermedizin.de/resource/supplementary/13037_2011_109_MOESM1_ESM.pdf/9659334)
Supplement: MOESM1 [file 9659334]

Name: PATIENT, TEST

30 Y

Admitted: 12/31/2008

Ortho M&M:

Ortho Team:

/

MRN: 9876543HH

FIN: 12345678

Trauma #: 1

Reported Event:

Co-Morbids:

I. Status

- A. Complication
- B. "Near miss" event
- C. "No harm" event
- D. Death
- E. Not a complication
- F. Not an Ortho complication

II. Specific Complication

- A. Postoperative infection
- B. Failure of reduction/fixation
- C. Misplaced implant
- D. Fracture-Nonunion
- E. Wound healing issue
- F. Failure of flap or replantation
- G. Postop bleeding/hematoma
- H. Vascular injury
- I. Neurologic injury
- J. Medical complication (e.g. MI, pneumonia, etc.)
- K. DVT/PE
- L. Death
- M. Other: \_\_\_\_\_

III. Patient Harm/Outcome (Related to Complication)

- A. Unplanned return to OR
- B. No harm
- C. Harm
- D. Death
- E. Not determined

IV. Contributing Root Cause

- A. Communication
- B. Supervision
- C. Indication
- D. Technique
- E. Treatment concept
- F. Judgment error
- G. Aftercare
- H. System issue
- I. Patient compliance
- J. Patient selection
- K. Co-morbidities
- L. Injury severity
- M. No root cause evident
- N. Other: \_\_\_\_\_

Preventable VI. - 1

Non-Preventable VI. - 3

Equivocal VI. - 4

V. Corrective Action

- A. Education at QA Conference
- B. Guideline/protocol
- C. To PI Committee/Peer Review

VI. Preventability

- 1. Preventable
- 2. Potentially Preventable
- 3. Non-Preventable
- 4. Equivocal

VII. Disclosure

- A. Occurred  
By whom? \_\_\_\_\_  
Date: \_\_\_\_\_  
Time: \_\_\_\_\_
- B. Did not occur  
Reason: \_\_\_\_\_

Procedure Start: 02/01/2010 08:30

Procedure End: 02/01/2010 08:59

Antibiotics Start: 02/01/2010 08:00

Total Tourniquet Time: 00:22

Heparin Start: 07/26/2009 12:00

Last Heparin: 07/28/2009 17:00

COMMENTS RELATED TO PROCEDURE, ABX, HEPARIN HERE
